# Supplementary material for: Implication of ZNF217 in Accelerating Tumor Development and Therapeutically Targeting ZNF217-Induced PI3K–AKT Signaling for the Treatment of Metastatic Osteosarcoma
Source: Oxford University Press journal article supplement (doi:10.1158/1535-7163.mct-20-0369), 2020-09-30
Supplement: 15357163mct200369-sup-242729_2_supp_6477089_qjlj4k.xlsx [file 15357163mct200369-sup-242729_2_supp_6477089_qjlj4k.xlsx]

## Sheet: Sheet1
Gene	Fold change	FDR adjusted p value
SCUBE1	-40.8086	0.00707594
FOXJ1	-32.996	0.0114452
PAEPP1	-25.2181	1.63801e-08
PAEP	-21.8547	0.000570656
FAM131B	-20.8066	0.0442739
VSIR	-19.7668	0.00269947
AL732437.2	-19.3494	0.000399228
CSF2	-19.209	0.0125975
FOSB	-18.3065	0.0125975
DTX3	-17.8409	0.0310749
B4GALNT4	-17.7855	2.19484e-05
MN1	-16.4378	2.40671e-06
FOS	-15.516	0.00901885
INHBA	-14.0646	5.45803e-05
TIMP3	-13.0471	1.73261e-20
GIPC3	-11.8276	0.000554169
EGR1	-11.3315	0.0125975
TM6SF1	-11.1941	0.0011663
NID1	-11.1678	7.81378e-12
NR2E3	-10.3511	0.0164776
PDGFB	-10.2072	0.0104742
PODXL	-10.0966	1.30133e-12
SLC45A1	-9.41338	0.0387889
MGAT3	-9.27208	0.00543336
ZNF853	-9.01717	0.00145016
PRRT2	-8.98978	0.00992949
DGAT2	-8.97361	0.0158682
MDGA1	-8.92369	0.00115454
DACT1	-8.14991	2.6385e-05
NPNT	-7.97878	0.0441694
H1F0	-7.65273	1.28385e-05
RPSAP52	-7.57668	0.023386
MYO7B	-7.05799	0.0282068
FNDC4	-6.99787	0.0117317
APCDD1L	-6.906	0.0481166
SFN	-6.83271	0.0406396
FRG1	-6.7701	1.89738e-05
COL22A1	-6.66128	0.00328005
MMP9	-6.64768	3.13386e-07
TP73-AS1	-6.42885	0.030612
FXYD6	-6.26919	0.000852579
AL451042.2	-6.25685	0.0284987
MEX3A	-6.23601	0.0155137
MATN3	-6.07585	0.015166
BRSK1	-5.9147	0.00644147
ICAM5	-5.76095	0.00414352
RASL10A	-5.69027	0.0254619
THBD	-5.67801	2.40106e-05
NOG	-5.67212	0.00283325
DCHS1	-5.47983	0.000399228
ST6GAL1	-5.24286	5.64683e-05
ALDH1A3	-5.11931	3.55701e-05
ELOVL7	-4.95279	0.0251074
COL6A2	-4.75116	0.000267127
HSPG2	-4.62873	0.000467538
SLC29A4	-4.56132	0.0420437
CORO2B	-4.52972	0.00296027
PIANP	-4.51915	0.0142767
LGI2	-4.42429	0.0401706
CSRNP1	-4.41815	0.0188913
CASP3	-4.39698	3.1363e-06
SNCB	-4.38712	0.0213144
CTSV	-4.34233	0.0017595
SFRP1	-4.31712	5.75356e-07
SEMA7A	-4.29924	0.000118538
MAPK8IP1	-4.25266	0.0307653
SERPINE1	-4.2478	3.21139e-07
ADGRB1	-4.22384	0.0170441
ADIRF-AS1	-4.16274	0.00352755
OXTR	-4.15902	0.025303
MKNK2	-4.15154	4.90281e-06
BCL2A1	-4.11892	0.00230732
SORCS2	-4.0772	0.0114248
RNF125	-4.04733	0.0434491
SCUBE3	-4.04041	0.000798825
RGS3	-4.02224	0.00291612
NOVA2	-4.01709	0.0479101
PIM1	-3.97337	0.0251074
TCF7L2	-3.93438	0.00352755
ATP2B4	-3.90419	0.000798825
HIC1	-3.84884	0.000539309
MYH16	-3.8102	0.0305165
CAMK2N1	-3.76207	0.00117888
JUN	-3.75769	0.000436659
MYO10	-3.73608	1.07494e-06
PTPRS	-3.72514	0.000457478
CHD5	-3.69738	0.023077
SMTN	-3.6783	3.55701e-05
KDM7A	-3.62752	0.0456059
CYP11A1	-3.5694	0.00235092
WNK4	-3.56311	0.00128651
PMEPA1	-3.54799	0.0355184
DPF3	-3.54234	0.00145444
NARS	-3.52469	0.000220344
ABCA1	-3.43262	0.00296044
ZNF185	-3.4109	0.0117066
PALM2	-3.4002	0.0481166
NOL4L	-3.32952	0.00776338
TENT5B	-3.32534	0.0443937
EEF1A2	-3.302	0.00153625
PPIL1	-3.28598	0.000312112
CCN2	-3.24578	0.0251074
TRIB1	-3.2248	0.0390663
KALRN	-3.22064	0.0483904
CREB3L1	-3.20893	0.0438333
SPOCD1	-3.14702	0.00145444
GDNF	-3.12911	0.0460311
AHNAK	-3.11771	0.000197794
SH3PXD2A	-3.11658	0.00662633
PNRC2	-3.11489	0.000164947
DENND3	-3.05506	0.012082
COL6A3	-3.05118	0.0117066
OSTC	-3.0213	0.000163596
AHNAK2	-3.00452	0.00109961
COL9A3	-3.00138	0.00417788
SASH1	-2.98166	0.00186245
IL1A	-2.97473	0.00944151
TLE1	-2.97044	0.00184556
CLPTM1L	-2.9547	0.00117888
COL6A1	-2.93063	0.00346958
CLMN	-2.93055	0.0191615
VLDLR	-2.91917	0.0251074
DUSP6	-2.89874	0.048283
GPSM1	-2.88648	0.00695164
CSPG4	-2.88647	0.00458447
RASSF8	-2.88142	0.000942749
FN1	-2.86478	0.00144884
ATP8B2	-2.84683	0.000461267
MAFF	-2.84276	0.0349925
BGN	-2.83414	0.00314024
SLC4A7	-2.82192	0.00754336
MARCKSL1	-2.82146	0.000438966
HABP4	-2.79845	0.0442739
GEM	-2.78985	0.0122388
EFNB1	-2.75492	0.000803457
CORO1C	-2.73306	0.00377889
SOX9	-2.72993	0.00639714
FAM214B	-2.723	0.0476825
TNFRSF25	-2.71679	0.0249989
CCDC85C	-2.71386	0.00371554
ANPEP	-2.71178	0.000824099
KLF2	-2.7101	0.0471176
RHOF	-2.70681	0.0402679
AXL	-2.7044	0.00145057
UBE3A	-2.70105	0.00235092
RHOB	-2.69351	0.00208187
ADAMTS6	-2.68404	0.0438333
KCNN4	-2.67851	0.0177301
COL18A1	-2.67782	0.0302361
CCN1	-2.67576	0.00244308
BTBD11	-2.66933	0.0204252
CTSB	-2.66701	0.00298973
PDHA1	-2.6465	0.00145444
KCNG1	-2.64314	0.00151592
AL365203.2	-2.63099	0.0260969
SH3KBP1	-2.6278	0.00361553
MYC	-2.57488	0.0103982
SF3B2	-2.5699	0.00151273
INSIG1	-2.56225	0.0125722
PDCD4	-2.55607	0.0323233
IFFO2	-2.51831	0.0253281
SERINC2	-2.49058	0.0416484
SULF2	-2.48773	0.0157325
ZFP36L1	-2.43095	0.00531505
HBEGF	-2.42412	0.0204252
ADAM19	-2.41959	0.00533971
AC080038.1	-2.41879	0.0305578
USP12	-2.41855	0.0125975
MAP2K3	-2.41251	0.0101184
MMP14	-2.40208	0.00658504
KIAA1549L	-2.39938	0.0119208
VAT1L	-2.39404	0.0441694
PDPN	-2.36215	0.0416086
CKAP4	-2.35886	0.00657319
AFAP1	-2.34207	0.0486929
RAB22A	-2.33757	0.023077
RBPJ	-2.33057	0.0329935
SUMO2	-2.31109	0.009224
GNB1	-2.3059	0.00901885
UHRF2	-2.26074	0.0282068
NET1	-2.2174	0.0441694
NPAS2	-2.21456	0.023077
PTPN9	-2.20404	0.0271361
LRRC8A	-2.18912	0.0310749
UQCC2	-2.18486	0.0307653
PYCR1	-2.17995	0.0251074
AMOTL2	-2.17934	0.037321
BASP1	-2.15959	0.0480895
MTPN	-2.15925	0.0401706
RAD21	-2.14974	0.0277833
FMNL3	-2.14088	0.0356725
CERK	-2.14065	0.0460812
UAP1	-2.13067	0.0297472
SSBP3	-2.11794	0.0467484
MFAP2	-2.10138	0.0406396
CD59	-2.07568	0.0359809
FRMD4A	-2.06493	0.0442739
RPS19BP1	-2.04785	0.0490749
FTL	2.0863	0.0342676
DHCR7	2.10642	0.0441694
AIFM2	2.19621	0.0221112
EPS8	2.20813	0.0459099
SLC39A8	2.24768	0.0297472
PARP14	2.2635	0.0261054
DDX58	2.26538	0.0229697
SLFN11	2.27741	0.0248221
MGST1	2.27847	0.00944151
UBXN11	2.28886	0.0480647
DDX10	2.28956	0.0243956
ME1	2.31128	0.0170441
HEG1	2.32396	0.0157356
AOPEP	2.32457	0.0239891
MVK	2.381	0.0243956
MSMO1	2.40877	0.00830936
MYOSLID	2.42133	0.0253256
ERAP1	2.4555	0.0260969
SYNM	2.46467	0.00780189
PKIA	2.4648	0.0356725
IFI44	2.50546	0.00276094
IDH1	2.53615	0.00644147
SLC38A7	2.55631	0.0408615
MAPRE2	2.56398	0.00313646
STAMBPL1	2.59417	0.00873458
COL4A6	2.64048	0.027198
CXCL3	2.64274	0.0195022
IRF1	2.65312	0.00639714
HMGN5	2.6787	0.00212782
MCTP1	2.6855	0.0412284
GCLC	2.69209	0.0017595
HECW2	2.73871	0.0309041
IFI6	2.74174	0.0323233
ABHD4	2.74712	0.0101184
LMLN	2.7799	0.027198
EYA4	2.80639	0.00944151
ZC3HAV1	2.81058	0.000387893
NMI	2.85639	0.00170558
TUBAL3	2.87131	0.0492031
L3HYPDH	2.93318	0.0117317
P3H2	3.00204	0.000395431
BIRC3	3.02012	0.00212764
HECW2-AS1	3.04464	0.0480895
PLS1	3.08251	0.0253535
LZTS1	3.12251	0.0305165
UBE2L6	3.14872	0.0318995
TLR6	3.17956	0.0383896
APOL6	3.18383	0.00755919
HSPA4L	3.19415	0.00511935
AKR1C3	3.21145	0.0159885
TRPA1	3.22449	0.00312818
ELOVL4	3.23542	0.0197297
SEMA3C	3.2902	0.0441694
TRPV2	3.29278	0.0154013
ENTPD7	3.31837	0.00145444
CLU	3.46136	9.85181e-06
BTN3A2	3.59128	0.00153625
SAMHD1	3.59609	0.000387893
SQSTM1	3.59897	0.0269022
IFIH1	3.6018	0.00153167
HIST2H3PS2	3.61431	0.0297872
IFIT1	3.6535	3.21032e-05
HERC6	3.65706	7.65821e-05
LINC02577	3.6998	0.00863692
CEACAM1	3.70268	0.0448827
MYO5B	3.71402	9.61495e-05
PARP9	3.72695	0.00144884
SMIM10	3.76267	0.00515163
AC002480.1	3.81038	0.00672801
FGFBP3	3.838	0.0211295
PARP10	3.84693	0.0392747
PIR	3.84759	0.00401548
CEBPD	3.88683	0.0207659
GLT8D2	3.90082	0.00209948
USP18	3.93042	0.0150685
SLC37A1	3.96321	0.00682966
PLAAT4	3.99673	0.0136
LINC02328	4.03373	0.0379997
TMEM45A	4.04674	0.00896751
RAB27B	4.07375	0.00818778
ST8SIA4	4.10156	0.0292974
SCAT8	4.11486	0.0368734
TRANK1	4.14427	0.00312818
CXCL11	4.16137	0.00225956
CARD6	4.21036	0.00393542
EEPD1	4.21723	0.00142382
AC124798.1	4.22721	0.000323673
PLSCR4	4.3568	0.0208125
LINC02615	4.38227	0.0261054
PRRG4	4.39227	0.0373991
SH3RF2	4.45328	0.032282
EVI2A	4.46768	0.0342676
AP005136.3	4.52284	0.0229697
SLC18B1	4.53417	0.000267127
AC107959.3	4.61871	0.0368734
PCDH9	4.67201	0.0125975
AC099066.2	4.81106	0.00639714
DOCK8	4.8312	0.0202125
LINC01094	4.83959	0.0191966
STYK1	4.8839	0.0302949
IGSF10	4.89095	0.00774001
BTN3A3	4.89869	0.000153262
CASC15	4.9105	0.048283
TSPAN1	4.93037	0.0260969
CA8	4.93765	0.00499482
TSPAN7	4.96086	0.0229697
SCN3A	5.00527	0.0191966
COL8A1	5.04161	0.00290163
KCNJ2	5.05297	0.0435928
SAMD9L	5.08812	0.00199992
ADGRF4	5.20547	0.0120956
GLDN	5.21531	0.0402679
ABCB1	5.34149	0.000399675
NNMT	5.42959	8.22819e-11
DNAH7	5.48655	0.0251161
EPDR1	5.50632	3.53022e-05
ENPEP	5.51821	0.00404236
CCDC102B	5.61009	0.00243584
MTUS1	5.636	0.000583444
NBEAP1	5.65306	0.0454676
OSGIN1	5.67433	1.58287e-07
PCDH10	5.72892	0.00259731
SELL	5.81473	0.00504199
AC006369.1	5.82236	0.0241558
POT1-AS1	5.83417	0.00818778
PARM1	5.94918	0.000434599
SLC7A11	5.97982	1.27888e-11
AC013652.1	5.98828	0.0101184
GALNT3	6.05181	0.000346373
SOX5	6.10541	0.0204252
GBP2	6.10743	0.0251074
TRIM16	6.12647	1.23803e-09
SEMA3E	6.1366	0.00921253
IFIT2	6.16568	7.66278e-10
AC098487.1	6.16649	0.000436659
AKR1C2	6.36822	0.0229697
RASGRP3	6.43925	0.0473628
APOL3	6.4763	0.00352755
STAT4	6.52126	0.0239891
PPARGC1A	6.53338	0.0307653
GPR85	6.54756	0.0169274
EPSTI1	6.64004	2.03017e-05
AC005914.1	6.70961	0.0291625
IL6	6.71349	0.00738618
EYA1	6.78309	0.0226752
LINC01182	6.87917	0.00944151
SCN2A	6.9823	0.0251074
GASK1A	7.17143	0.0158682
LINC02669	7.27911	3.86536e-05
AP001596.1	7.28319	0.00797886
CYP39A1	7.32616	0.00468728
PHACTR3	7.40336	0.0261054
GPM6A	7.69671	0.00818778
F2RL2	7.8865	2.70871e-07
ACY3	7.8955	0.00505668
LINC00536	7.95737	0.0448827
GAPLINC	7.98141	5.64683e-05
PLAC1	8.05542	0.00052583
SLC38A4	8.06608	0.0197906
PCDH7	8.07788	7.67464e-09
CALCRL	8.4362	0.0202125
ADAM28	8.67325	0.00269275
ZNRD1	8.81457	0.00384924
SPATA12	8.96778	0.000749397
AC135893.1	9.25938	0.00496016
TMEM253	9.48917	0.0188913
CMAHP	9.58532	0.0141024
MSRA	9.70197	0.000972636
AC004551.1	9.73062	1.49121e-05
IL18	9.79881	0.00184556
COL6A5	9.85709	0.0270888
AL355916.1	9.95714	1.52297e-05
RSPO3	10.0706	0.00026611
AP000808.1	10.1428	0.0123826
KIAA0319	10.1983	0.000764283
TMEM108-AS1	10.4205	0.00417788
TRPC4	10.4424	0.027198
GBP1	10.7892	0.00901885
AC113383.1	10.9687	0.00370376
AKR1C1	11.0094	2.50389e-05
SPP1	11.1484	2.69319e-16
SLPI	11.3848	0.0119203
TRIM16L	11.6002	2.51692e-16
MMP7	12.0593	0.00328005
TRIML2	12.0829	0.000267627
IFIT3	12.0881	4.7832e-21
SCIN	12.702	0.00499482
CFI	13.1408	0.000701895
TMEM71	13.4024	1.52297e-05
CABCOCO1	13.4272	0.023077
KIAA1324	13.5666	0.000119472
C6orf58	13.9907	7.64856e-07
CALHM5	14.0543	1.35416e-08
CSMD3	14.6684	0.000610978
GIMAP2	14.8313	0.0269022
VIT	14.9489	6.49182e-06
CFH	15.4505	8.43544e-13
AL049775.3	15.5682	0.0177576
SMPDL3B	15.5779	1.56152e-05
ZSCAN31	15.6403	9.34253e-10
ANGPT1	15.8045	1.52297e-05
ATP6V0D2	15.8661	3.68281e-10
LIPH	15.9107	2.30912e-06
DGKI	16.0182	0.0154013
WFDC21P	16.1532	0.0101184
EVI2B	16.3409	3.47087e-06
AC012625.1	16.4644	0.0090934
RPRM	16.5797	0.00173266
CLCA3P	16.5827	0.00645075
CDK15	16.9429	0.00481745
AC105177.1	17.1698	0.0438333
MIR3190	17.1698	0.0438333
AL138885.4	17.8291	0.0485808
CHST4	17.9399	0.00101136
IL18RAP	18.4458	0.000457478
LINC01949	18.4752	0.00326871
SULT1A1	18.6661	0.032282
DHRS4	19.0795	7.1856e-05
TFEC	19.2833	0.0290986
KYNU	19.389	2.09012e-09
AC009804.1	19.6048	0.0438333
LINC00326	20.771	2.51899e-11
TNIP3	21.5853	2.51899e-11
AC005747.1	22.1234	0.0129437
LINC00520	23.7018	0.000644644
NRG4	23.73	5.86797e-06
MANSC4	24.2705	0.00716343
TRIM22	24.3253	0.00716343
NMRAL2P	27.691	3.44502e-10
CH25H	27.8196	0.000164947
SERTM2	28.9995	0.000110528
COL24A1	29.1883	0.00276094
GCNT3	30.6611	6.86303e-08
P4HA3	32.3111	0.00145016
IGSF11	33.0051	0.00117888
SERPINB4	34.035	0.00174594
GASK1B	34.067	0.00112272
C3AR1	36.5231	2.51692e-16
RNF43	39.4158	1.20815e-07
PI3	41.5024	2.46064e-08
GPSM3	62.4731	0.0139457
ANKRD22	65.6558	2.38871e-11
